# Supplementary material
Source: PubMed Central journal article supplement (PMC10524326)
Supplement: NIHMS1903175-supplement-Supinfo1.pdf [file NIHMS1903175-supplement-Supinfo1.pdf]

| <b>Reagent</b>                                       | <b>Vendor</b>               | <b>Catalog</b> | <b>Dilution</b> | <b>Species</b>                   |
|------------------------------------------------------|-----------------------------|----------------|-----------------|----------------------------------|
| $\alpha$ -BUNGAROTOXIN (labeling of NACHRs)<br>AF488 | Thermo Fisher<br>Scientific | B13422         | 1:1000          | <i>Bungarus<br/>multicinctus</i> |
| FZD7                                                 | Abcam                       | ab64636        | 1:1000          | Rabbit                           |
| $\beta$ -Catenin                                     | Santa Cruz                  | sc-7963        | 1:1000          | Mouse                            |
| $\gamma$ -Tubulin                                    | Sigma Aldrich               | T6557          | 1:1000          | Mouse                            |
| H2B                                                  | Abcam                       | ab1790         | 1:1000          | Rabbit                           |

Supplemental Table 1: Reagents and antibodies used for immunohistochemistry and immunoblotting
